# Supplementary material for: Ni(OH)2@Cu dendrite structure for highly sensitive glucose determination
Source: Royal Society of Chemistry journal article supplement (doi:10.1039/c4ra05521g), 2014-01-01
Supplement: c4ra05521g1.pdf [file c4ra05521g1.pdf]

## Supporting Information

### Ni(OH)<sub>2</sub>@Cu dendrite structure for highly sensitive glucose determination

Hyeri Jung, Sang Ha Lee, Jiao Yang, Misuk Cho and Youngkwan Lee\*

Department of Chemical Engineering,

Sungkyunkwan University, 440-746 Suwon, Korea

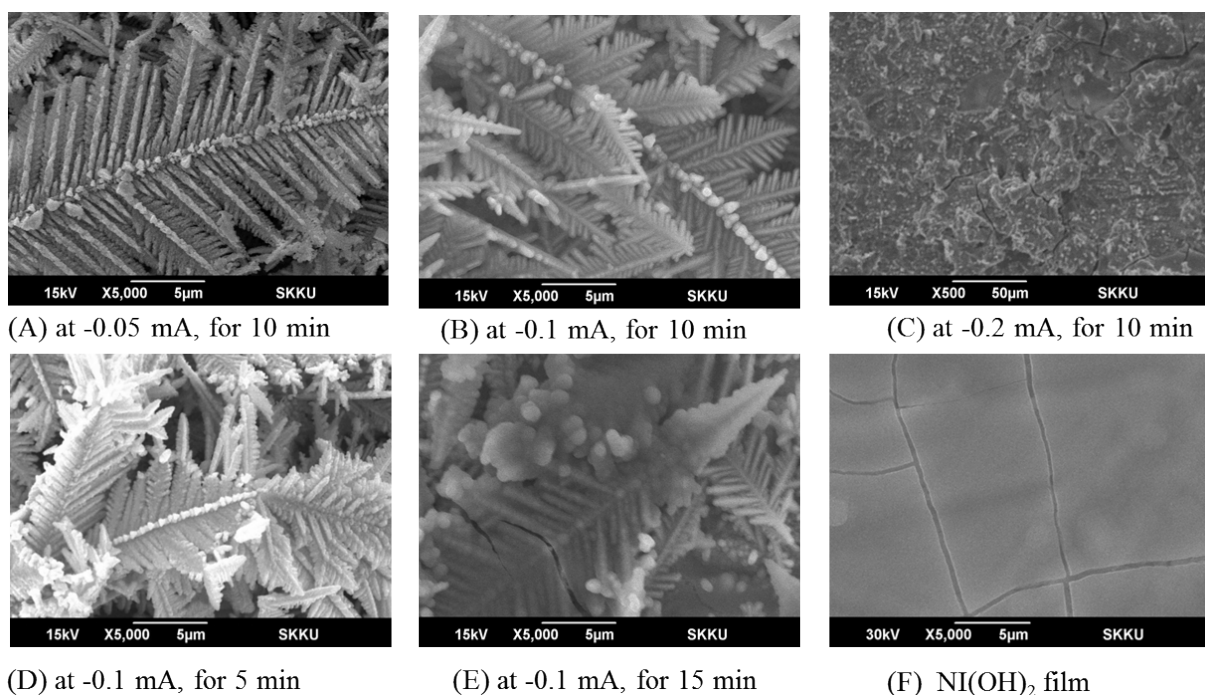

**Figure S1.** SEM images of various electrodes:

Ni(OH)<sub>2</sub> @ Cu dendrite prepared at different applied current [-0.05 mA (A), -0.1 mA (B), and -0.2 mA (C)]; Ni(OH)<sub>2</sub> @ Cu dendrite prepared at different deposition time [5 min (D) and 15 min (E)]; Ni(OH)<sub>2</sub> film (F)

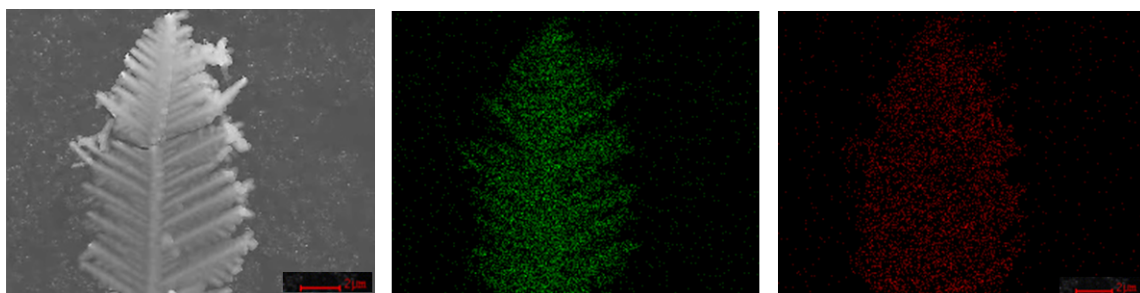

(A) EDX image  
of  $\text{Ni}(\text{OH})_2$  @ Cu dendrite

(B) Element mapping - Cu

(C) Element mapping - Ni

**Figure S2.** EDX image of  $\text{Ni}(\text{OH})_2$  @ Cu dendrite (A) and elemental mapping overlay images of Cu (B) and, Ni (C)

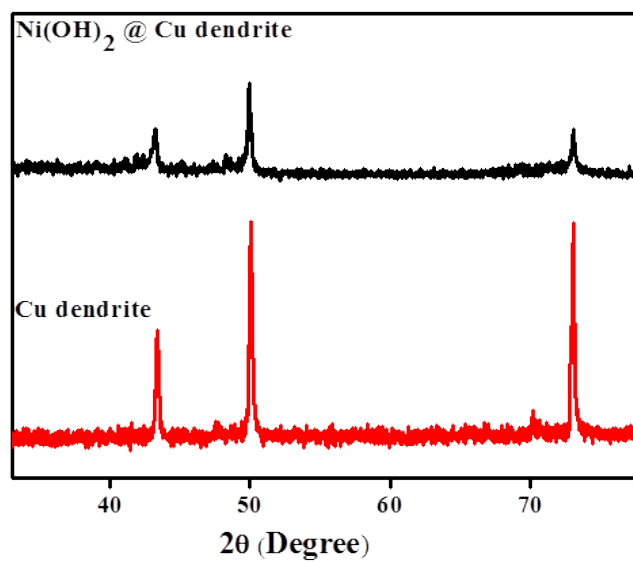

**Figure S3.**

XRD patterns of  $\text{Ni(OH)}_2 @ \text{Cu dendrite}$  and  $\text{Cu dendrite}$  by electrodeposition

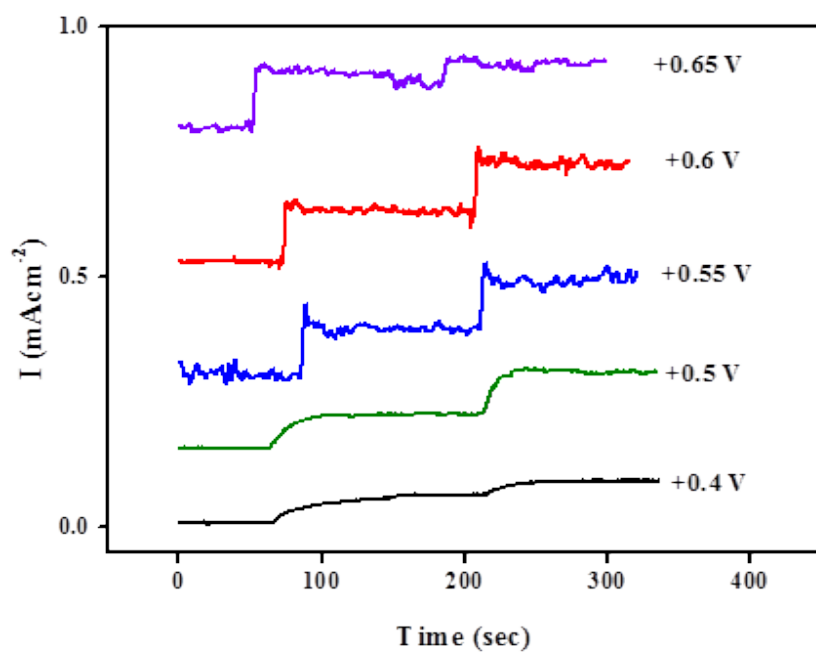

**Figure S4.** Amperometric responses of Ni(OH)<sub>2</sub> @ Cu dendrite to successive additions of 0.1 mM glucose as a function of applied potentials +0.4, +0.5, +0.55, +0.6, and +0.65 V, respectively
